# Supplementary material
Source: Research Square preprint supplement (doi:10.21203/rs.3.rs-9469558/v1)
Supplement: Supplementary file 2 [file c7e59352ea066b521f8c0765.xlsx]

## Sheet: Quotes
#	Author	Title	Year	Article Type	Cognitive Elements	Clinical Reasoning	Teaching Approaches	Non-Cognitive Elements	EBM	Clinical Reasoning Definition ("CR is X...")	Education Shortcomings	Mentions	Illustrative Quotes	Themes	EBM # articles	EBM mentions	EBM quotes	Teaching Approaches	TA Mentions	Illustrative Quotes	theme	Models/Frameworks	Models Mentions	Illustrative Quotes	Cognitive Processes	# mentioned	Cognitive processes mentioned	Teamwork & Communication Skills	Teamwork & Comm skills Qoute
1	Amey, Dr Lisa; Donald, Professor Kenneth J; Teodorczuk, Associate Professor Andrew	Teaching clinical reasoning to medical students	2017	Orginial Research	4	5					1	2	Despite our increased understanding of clinical reasoning as a phenomenon, there remains a deficit of robust studies looking at the effectiveness of clinical reasoning teaching and learning in medical students. The authors contend that clinical reasoning should be a core skill taught by medical schools. However, historically, it has not been explicitly taught; instead it is incorrectly assumed th…	Clinical reasoning; ineffective approach				1	1	supervising clinicians have limited time to appropriately break down and teach the clinical reasoning process. By teaching a framework and introducing the theory of clinical reasoning during the preclinical years medical students can begin their clinical placements with the tools to not just watch their senior colleagues ‘magically’ make a diagnosis, but instead use a ‘hypothetico-deductive’ appr…	deliberate clinical reasoning teaching; hypothetic-deductive reasoning				1	2	Heuristics; HDR
2	Barrows, H. S.; Feltovich, P. J.	The clinical reasoning process	1987	Orginial Research	4	8	1																		1	4	Heuristics; HDR; Schemas
3	Berndt, Markus; Fischer, Martin R.	The role of electronic health records in clinical reasoning	2018	Review	1	26			1		1	1	However, to this day, the systematic implementation of learning and teaching of SRA-related skills within medical curricula is not yet common, disregarding the fact that all stakeholders consistently voice the need and importance for the implementation.	Neglected element	1	2	The higheststrengthisaccredited to quantitative evidence such as systematic reviews ofrandomized controlled studies, followed by individual randomized controlled trials with narrow conﬁdence intervals, systematic reviews of cohort studies, and individual cohort studies. In addition, qualitative evidence can yield insights of a lower evidence strength, such as systematic reviews ofcase–control stu…								1	1	Meta-Cognition
4	Bissessur, Sanjay W.; Geijteman, Eric C. T.; Al‐Dulaimy, Muhammad; Teunissen, Pim. W.; Richir, Milan C.; Arnold, Alf E. R.; De Vries, Thep P. G. M.	Therapeutic reasoning: from hiatus to hypothetical model	2009	Orginial Research	6	2			1																1	3	HDR; Schemas
5	Bleakley, Alan; Farrow, Richard; Gould, David; Marshall, Robert	Making sense of clinical reasoning: judgement and the evidence of the senses	2003	Orginial Research	6	8			1		1	1	There is a vital aesthetic dimension to clinical judgement. This dimension is neglected in the medical education literature. Clinical reasoning has been well documented as a technical issue informed by contemporary cognitive psychology, and as an ethical issue, informed by both philosophical and narrative approaches to bioethics (a traditional concern of the medical humanities). Where clinical re…	clinical judgment; Neglected element				1	2	The following summarises the proposals made thus far concerning education of clinical judgement in visual domains. Firstly, such an education can be made more explicit, or formalised, and not left purely to the tacit gaining of expertise through work-based apprenticeship, as traditional immersion in a specialty. Secondly, learning outcomes can be conceived in the affective domain concerned with a…	visual domain and clinical judgment				1	5	Heuristics; Analytical (novice); Non-Analytical (expert); Bounded Rationality
6	Chamberland, Martine; Mamede, Silvia; Bergeron, Linda; Varpio, Lara	A&nbsp;layered analysis of self-explanation and structured reflection to support clinical reasoning in medical students	2020	Orginial Research	7	2																			1	3	Deliberate Reflection
7	Chen, Hao; Xuan, Hanwen; Cai, Jinquan; Liu, Meichen; Shi, Lei	The impact of empathy on medical students: an integrative review	2024	Review		1	6	14										1	1	Besides, in order to provide highquality patient care, the cultivation of medical affective should focus on both training medical skills and cultivating affective skills. Compared to clinical knowledge and skills, professional spirit and empathy are relatively more difficult to cultivate [3]. Considering that medical student, who officially become doctor after graduating from medical school, will…	Emotion and affective teaching
8	Conn, Jennifer J; Lake, Fiona R; McColl, Geoffrey J; Bilszta, Justin L C; Woodward‐Kron, Robyn	Clinical teaching and learning: from theory and research to application	2012	Orginial Research	2	3	2	10	2						1	2	Medical education research has also focused on the most effective methods of teaching students physical examination skills.2,21 This has occurred against a background of increasing emphasis on applying evidence-based standards to physical diagnosis, based on research into the sensitivity and specificity of individual manoeuvres and enabled by technological advances such as magnetic resonance imag…	1											"Effective communication is essential for accurate and efficient data collection, developing rapport with patients and facilitating teamwork with other health professionals. Communication skills training is therefore an essential component of medical school programs"
9	Cooper, Nicola; Bartlett, Maggie; Gay, Simon; Hammond, Anna; Lillicrap, Mark; Matthan, Joanna; Singh, Mini; On behalf of the UK Clinical Reasoning in Medical Education (CReME) consensus statement group	Consensus statement on the content of clinical reasoning curricula in undergraduate medical education	2021	Consensus	6	66	1	4		"Clinical reasoning can be defined as, ‘A skill, process, or outcome wherein clinicians observe, collect and interpret data to diagnose and treat patients. Clinical reasoning entails both conscious and unconscious cognitive operations interacting with contextual factors such as the patient’s unique circumstances and preferences and the characteristics of the practice environment	1	2	Undergraduate medical curricula provide instruction in the basic elements of the diagnostic process, for example taking a history, performing a physical examination, and generating a differential diagnosis. However, students and postgraduate trainees largely learn the knowledge, skills and behaviours required for effective clinical reasoning implicitly, through experience and apprenticeship. Ther…	clinical reasoning; neglected element				1	3	There is a growing consensus that medical schools and postgraduate training programmes should teach clinical reasoning in a way that is explicitly integrated into courses throughout each year of the programme, adopting a systematic approach consistent with current evidence.	explicit teaching of CR				1	1	Metacognition
10	Croskerry, Pat	A Universal Model of Diagnostic Reasoning:	2009	Orginial Research	13	3			1						1	1	Thirty years ago, this dilemma was presciently recognized by Elstein57 as a notes, the clinical-statistical polarization. The prevailing perception among medical decision makers at that time was that there was no scientific worth without quantification and statistics (i.e., the System 2 approach), a view that is little changed today: “The broader community ofmedical decision making researchers,” …	1							1	5	Gestalt; Analytical Approach; Metacognition; Heuristics
11	Croskerry, Pat; Graber, Mark L.	The importance of cognition for improving diagnostic safety: Salerno redux?	2025	Review	3	21		3			1	2	Indeed, most healthcare providers have limited exposure to the whole realm of cognition andwhatitmeans fortheir behavior. Unquestionably, cognition plays a critical role in clinical medicine. This is especially true for the process of establishing a diagnosis, and eﬀorts to improve clinical reasoning are now front and center in the quest to reduce the harm associated with diagnostic errors. Educa…	clinical reasoning; cognition; neglected element											1	1	Heuristics
12	Cuevas-Badallo, Ana; Torres González, Obdulia	Medical expertise as hybrid expertise: a proposal for the articulation of medical knowledge	2025	Orginial Research	4	1	1																		1	2	Intuition
13	Custers, Eugène J. F. M.	Thirty years of illness scripts: Theoretical origins and practical applications	2015	Orginial Research	8	2	3											1	1	the Script Concordance Test (Charlin et al., 2). This test measures to what extent a student’s script matches that of a panel of experts by asking, in individual items, what the effect of a new piece of information (e.g., a new finding) would be on the likelihood of a given script. Thus, this test forces the examinee to carefully assess new incoming information, rather than ‘‘guessing’’ a diagnos…	measure of reasoning				1	1	Schema
14	Custers, Eugène J.F.M.	Medical Education and Cognitive Continuum Theory: An Alternative Perspective on Medical Problem Solving and Clinical Reasoning	2013	Perspective	11	6												1	2	Teaching or training analytical problem solving in a clinical context should emphasize how to construct appropriate differential diagnoses on the basis of relatively few, but salient, clinical findings. “Authentic cases” may not be the first choice here because they are often complex, with too many findings to be amenable to a more analytical approach. Problem solving might benefit from small­gro…	explicit teaching; analytical problem solving
15	Cutrer, William B.; Sullivan, William M.; Fleming, Amy E.	Educational Strategies for Improving Clinical Reasoning	2013	Orginial Research	13	38	6	1			1	1	Fostering the development of clinical reasoning skills in medical trainees is challenging and far too often not explicitly addressed in formal curricula.	clinical reasoning; neglected element				1	7	Educators must keep in mind two important facets regarding the concept of scaffolding. First, scaffolding involves an active learning process. Through prompts and questions, students learn to re-organize knowledge on their own, as illness scripts cannot be linearly transmitted from teachers to students.11 Second, scaffolding relies heavily on immediate, real-time feedback as the learner articulat…	explicit teaching; scaffolding				1	4	Metacognition; Deliberate Reflection
16	Dreicer, Jessica J.; Parsons, Andrew S.; Joudi, Tony; Stern, Scott; Olson, Andrew P.J.; Rencic, Joseph J.	Framework and Schema are False Synonyms: Defining Terms to Improve Learning	2023	Orginial Research	16	26												1	3	As a learner’s clinical reasoning schema become more developed, they will need to consult externalized frameworks less often for common problems. However, in the age of ever-increasing and changing medical knowledge it is imperative to teach learners (through role modeling) to recognize when their schemas are insufficient for making a diagnosis or management decision [58, 59]. Situations that sho…	use of framework for teaching; CR; schemas				1	8	Schema; Illness Script
17	Dumas, Denis; Torre, Dario M.; Durning, Steven J.	Using Relational Reasoning Strategies to Help Improve Clinical Reasoning Practice	2018	Perspective	5	41																			1	1	Metacognition
18	Durning, Steven J.; Artino, Anthony R.; Schuwirth, Lambert; Van Der Vleuten, Cees	Clarifying Assumptions to Enhance Our Understanding and Assessment of Clinical Reasoning:	2013	Perspective	1	84	3	1										1	1	We would argue that education and assessment should focus less on the single best route through an encounter and focus more on the context as well as the “boundaries” or range of acceptable performance in an encounter.
19	Durning, Steven J.; Costanzo, Michelle; Artino, Anthony R.; Van Der Vleuten, Cees; Beckman, Thomas J.; Holmboe, Eric; Roy, Michael J.; Schuwirth, Lambert	Using Functional Magnetic Resonance Imaging to Improve How We Understand, Teach, and Assess Clinical Reasoning	2014	Orginial Research	4	48	4				1	1	Thus far, even the most modern methods designed to capture the process ofclinical reasoning have not been able to look beyond behavior; even completing a Script Concordance Test, extended matching question, or key-feature examination is a behavioral task from which we try to infer the process of problem solving.5 For example, think-aloud studies are among the best measures applied to date, but th…	clinical reasoning; ineffective approach
20	Durning, Steven J.; Jung, Eulho; Kim, Do-Hwan; Lee, Young-Mee	Teaching clinical reasoning: principles from the literature to help improve instruction from the classroom to the bedside	2024	Review	1	96	3	3			1	1	Despite this widely held perception of clinical reasoning there are a number of barriers to effective clinical reasoning instruction. For example, prior publications cite clinical reasoning as having a variety of definitions [5-7], faculty do not feel adequately prepared to teach this topic [8] and medical school curricula are not believed to spend ample time on teaching this essential ability [9…	clinical reasoning; ineffective approach				1	4	Also, be mindful of the learner’s cognitive load with providing instruction. Contemporary theory suggests we can hold up to four pieces of information in working memory. Therefore, be mindful of feedback to help the learner grow—if more than three pieces of advice, write them down for the learner. This first principle could be renamed as making the implicit explicit.	framework use; cognitive load; limitations to learning				1	1	Dual-process theory
21	Engeström, Yrjö; Pyörälä, Eeva	Using activity theory to transform medical work and learning	2021	Orginial Research
22	Epstein, Ronald M.	Defining and Assessing Professional Competence	2002	Review	5	17	9	18	2						1	2	Evidence-based medicine is an explicit means for generating an important answerable question, interpreting new knowledge, and judging how to apply that knowledge in a clinical setting But Polanyi5 argues that competence is defined by tacit rather than explicit knowledge. Tacit knowledge is that which we know but normally do not explain easily, including the informed use of heuristics (rules of th…								1	3	Heuristics, Schemas, Intuition (expert), HDR, Deliberate Reflection
23	Ericsson, K. Anders	Acquisition and Maintenance of Medical Expertise: A Perspective From the Expert-Performance Approach With Deliberate Practice	2015	Perspective	2		13	9			1	2	Just as simply watching a procedure is ineffective, so too are continuing medical education (CME) lectures and accumulated hours of professional experience. A review showed that attending CME lectures did not effect any meaningful changes in participating doctors’ actual practice. Similarly, other research has not shown sustained benefits of longer professional experience by health care professio…	ineffective approach				1	1	Studies of mastery learning show that trainees’ skill in performing medical procedures can be greatly improved over traditional medical education by providing the trainees with simulator training that provides immediate feedback and opportunities to repeatedly perform until they reach an objective criterion.	simulation approach				1	2	Intuition (experts)		"improved communication skills must be integrated into the trainee’s increasingly refined mental representations not only for encoding and combining patient information but also for perceiving and responding to patients’ reactions and expectations."
24	Feufel, Markus A; Flach, John M	Medical education should teach heuristics rather than train them away	2019	Orginial Research	7		2	2			1	2	It goes without saying that the more physicians know about pathophysiology, the better they will be at discriminating among diseases and selecting appropriate treatments.29 But alas, medical education is commonly organised around main effects associated with a speciﬁc discipline (e.g. anatomy, physiology or cardiology), organ (e.g. heart, liver or kidneys) or disease (e.g. causes, symptoms and tr…	ineffective approach				1	3	To prepare physicians and other health professionals for clinical decisions, their training should pay increased attention to interaction effects between symptoms and diseases. Rather than focusing on identifying and treating a speciﬁc health problem, emphasis should be placed on how to differentiate it from similar problems (differential diagnosis).					1	3	Heuristics (experts)
25	Guidry, Michelle M.; Drennan, Robert H.; Weise, Jeff; Hamm, L. Lee; Hamm, L. Lee	Serum Sepsis, not Sickness	2011	Orginial Research	1	24				"clinical reasoning is the ability to discern the important from the unimportant and to arrive at accurate and efﬁcient clinical conclusions."	1	1	we infrequently teach or self-examine the thought processes involved in organizing and applying this knowledge and understanding in the complex clinical setting.	ineffective approach; neglected element											1	1	Heuristics
26	Hall, Katherine H	Reviewing intuitive decision‐making and uncertainty: the implications for medical education	2002	Orginial Research	6	1												1	2	Finally, a ‘meta-theoretical’ issue needs to be resolved in deciding when and which heuristics are adaptive and useful tools for decisionmaking, as opposed to being sources of unwanted bias and error. Even while this latter task is being debated, however, the body of evidence justiﬁes, I believe, the incorporation of information and training in this area into medical school curricula	heuristics and uncertainty				1	5	Heuristics; Intuition (experts)
27	Hege, Inga; Kononowicz, Andrzej A.; Berman, Norman B.; Lenzer, Benedikt; Kiesewetter, Jan	Advancing clinical reasoning in virtual patients - development and application of a conceptual framework	2018	Orginial Research	9	84	2			"Clinical reasoning is a complex set of skills that encompasses the application of knowledge to collect and integrate information from various sources to arrive at a (working) diagnosis and management plan."	1	1	Healthcare students must acquire clinical reasoning skills and continue to build upon them in their clinical work [1]. However, experienced healthcare instructors often find it difficult to slow down and fully explain their clinical reasoning; reasons include the dynamic and often unconscious components of the reasoning process [1] and a lack of formal training.	clinical reasoning; neglected element				1	2	We suggest providing an individually increasingly challenging context of the virtual clinical encounter, for example by including irrelevant information or emotionally complex situations depending on the learner's skill level and goals. However, we consider it important to balance authenticity and cognitive load to not overburden the learners.	cognitive load; simulations/virtual encounters				1	1	Metacognition
28	Ju, Hyunjung; Choi, Ikseon	The Role of Argumentation in Hypothetico-Deductive Reasoning During Problem-Based Learning in Medical Education: A Conceptual Framework	2017	Orginial Research	5	1	14	1	1		1	1	However, several studies have reported that medical students struggle to transfer biomedical knowledge to clinical cases (Boshuizen & Schmidt, 1992; Diemers et al., 211; Prince et al., 2). Students’ difficulties in transferring their learning into problem solving can be attributed to diverse factors, such as their incomprehension of underlying concepts (simply memorizing definitions of concepts a…	ineffective approach				1	2	Within the context of HDR processes, it is important for medical students to engage in argumentation, including relating evidence for their claims and reasoning from the claims and evidence by integrating biomedical and clinical knowledge. Th e students’ argumentation will help build scientifi c, causal explanations for a patient’s problem and improve the quality of their scientifi c inquiry for …	hypothetico-deductive reasoning				1	5	HDR (definition given)
29	Khin-Htun, Swe; Kushairi, Anisa	Twelve Tips for Developing Clinical Reasoning Skills in the Pre-Clinical and Clinical Stages of Medical School	2019	Orginial Research	2	5	6		1	"Clinical reasoning (CR) can be defined as a complex process that is recursive, multidimensional, and involves informal and formal strategies for the analysis of patients’ information and evaluation of that information"	1	2	However, there is evidence that the development of CR skills in medical students is inadequate and they receive insufficient education in CR skills (Kong et al. 214) The best strategies to develop CR skills in students have been a subject of debate in literature. Challenges and barriers in teaching CR have been identified in the form of content, environmental, and teacher or expert physician fact…	clinical reasoning; neglected element; ineffective approach	1	1		1	2	We recommend that all formal teaching events should be case-based: symptom based teaching that includes mind-mapping for approaches to each symptom, online formative tests in the form of cases, case based teaching or simulation. Lectures may include presenting clinical cases and talking through them, while making connections on differential diagnoses and making evidence-based management decisions…	case-based learning
30	Koufidis, Charilaos; Manninen, Katri; Nieminen, Juha; Wohlin, Martin; Silén, Charlotte	Unravelling the polyphony in clinical reasoning research in medical education	2021	Scoping	22	59			1																1	9	Inferences; Bounded Rationality; HDR; Heuristics (notes flaws in heuristics
31	Kulasegaram, Kulamakan M; Grierson, Lawrence E M; Norman, Geoffrey R	The roles of deliberate practice and innate ability in developing expertise: evidence and implications	2013	Narrative	2	3	1				1	1	These applications of the DP principle by and large ignore the impact of individual differences. This is consistent with current medical education paradigms, which rarely address differences in individual ability, although, curiously, admissions and selection procedures are entirely concerned with measuring individual differences.	neglected element				1	1
32	Lane, Andrew Stuart; Roberts, Chris	Contextualised reflective competence: a new learning model promoting reflective practice for clinical training	2022	Orginial Research	7			1																	1	5	Deliberate Reflection (metacognition)		Good communication skills are vital to develop effective reflective practice.
33	Magnani, Lorenzo	Basic Science Reasoning and Clinical Reasoning Intertwined: Epistemological Analysis and Consequences for Medical Education	1997	Orginial Research	5	7	1																		1	2	Heuristics
34	Mamede, Sílvia; Schmidt, Henk G.	Deliberate reflection and clinical reasoning: Founding ideas and empirical findings	2023	Orginial Research	11	7	1																		1	7	Deliberate Reflection (metacognition); Intuition; Cognitive Load
35	Mathur, Arvind	Teaching Clinical Reasoning Through Cause‐and‐Effect Thinking: A Framework for Modern Medical Education	2025	Orginial Research	6	11	3											1	1	we propose the cause- and- effect clinical method (CECM)—a structured five- step framework that integrates clinical observation with core pathophysiological principles	framework: cause and effect clinical method				1	1	Metacognition
36	McColl, Geoffrey J; Bilszta, Justin; Harrap, Stephen	The requirement for bioscience knowledge in medical education	2012	Orginial Research	1	3	1	2	3		1	1	Given that emerging evidence supports the encapsulation model, a Flexner curriculum may not be the most effective way of developing clinical expertise from bioscience knowledge.	ineffective approach
37	Modi, Jyoti Nath; Anshu; Gupta, Piyush; Singh, Tejinder	Teaching and assessing clinical reasoning skills	2015	Orginial Research	3	4	13											1	3	Minute Preceptor (OMP) model. These can be utilized for teaching as well for formative assessment and are designed for use by the physician-teacher in a busy office or out-patient settin	framework: minute preceptor model				1	1	Intuition
38	Mohd Tambeh, Siti N.; Yaman, Mohamad N.	Clinical reasoning training sessions for health educators—A scoping review	2023	Scoping	3	1					1	2	A lack of knowledge transfer and application from pre-clinical to clinical students, as well as limited opportunities to practice CR, are several identiﬁed environmental barriers. In addition educators themselves have been demonstrated to be a barrier, because they may lack awareness oftheir own CR process and consequently provide insufﬁcient constructive feedback to students. Most educators in m…	clinical reasoning; neglected element Difficulty transfering from knowledge to practice. Educators as part of the problem -- idiosyncracies and shortcomings in meta-analysis of own abilities				1	1
39	Moosapour, Hamideh; Raza, Mohsin; Rambod, Mehdi; Soltani, Akbar	Conceptualization of category-oriented likelihood ratio: a useful tool for clinical diagnostic reasoning	2011	Orginial Research	4	2			3						1	4	Although the physicians’ intuitive clinical experience is usually the main source of learning about the diagnostic value of clinical findings, such unsystematic experience may not be as accurate as the information obtained from highquality diagnostic studies Diagnostic reasoning has been understood in the light of two paradigms for psychological research on clinical reasoning: problem solving and…	1	1						1	4	Bayesian Reasoning; intuitive; Illness Scripts; HDR; Schemas
40	Mylopoulos, Maria; Kulasegaram, Kulamakan; Woods, Nicole N.	Developing the experts we need: Fostering adaptive expertise through education	2018	Orginial Research	1	8					1	4	The models of expertise that dominantly underpin approaches to medical education are valuable for understanding the acquisition and retention of expert knowledge and skills,2-4 but do not sufficiently account for many of the capabilities essential for excellence in this changing health care context. In particular, approaches to medical education that overemphasize the mechanistic and unreflective…	ineffective approach				1	1	Critically, active learning must be coupled with an opportunity to see meaningful variation around conceptual or procedural knowledge. For experts, especially those in medicine, addressing variability is a crucial skill, and indeed, the most elite experts are marked by their ability to address the atypical or complex case. Medical education often begins with the “ideal” case to demonstrate concep…
41	Mylopoulos, Maria; Regehr, Glenn	Cognitive metaphors of expertise and knowledge: prospects and limitations for medical education	2007	Orginial Research	1	2					1	5	To date, as a result of the emphasis on expert–novice differences, it is likely that the traditional cognitively based studies of medical expertise have revealed more about routine expertise than adaptive expertise and have led to educational models for equipping our novices with more intellectual resources faster. Consistent with a "folk psychology" metaphor of the mind as a container, our resea…	ineffective approach; routine expertise; neglected element				1	1						1	3	Dual-Process; Heuristics; Encapsulation; Semantic Qualifiers
42	Mylopoulos, Maria; Regehr, Glenn	Putting the expert together again	2011	Orginial Research	5	1			1						1	1									1	2	Metacognition
43	Mylopoulos, Maria; Woods, Nicole N	Having our cake and eating it too: seeking the best of both worlds in expertise research	2009	Orginial Research	4	2												1	3	The framework of adaptive expertise explicitly recognises the particular demands of each problem and its context on expert practice, and identiﬁes the maintenance of an appropriate balance of distinct dimensions of problem solving as a core ability. It therefore presents opportunities for two lines of further research concerning, respectively, the exploration of expertise beyond the individual, a…	adaptive expertise framework				1	4	Encapsulation; Illness Scripts; Semantic Qualifiers
44	Nandi, P. L.	Ethical aspects of clinical practice	2000	Orginial Research				9		"Clinical reasoning is the cognitive process that makes it possible for us to reach conclusions from clinical data, and come to a clinical decision."								1	2	Because clinical ethics is so essential to medical prac- tice, it should be an integral part of medical education at all levels in medical school, in the residency, and in continuing education. During the past 2 decades, clinical ethics teaching and research programs have developed. Most medical schools in North America offer preclinical courses in medical ethics, several have programs during cli…	ethical teaching
45	Newble, D. I.	Assessing clinical competence at the undergraduate level	1992	Orginial Research		38	17
46	Newble, David I.	THE EVALUATION OF CLINICAL COMPETENCEM	1976	Review
47	Ng, Isaac K S; Goh, Wilson G W; Teo, Desmond B; Chong, Kar Mun; Tan, Li Feng; Teoh, Chia Meng	Clinical reasoning in real-world practice: a primer for medical trainees and practitioners	2024	Orginial Research	9		3	4		"Over the past few decades, many theories have emerged with regards to the nature of clinical reasoning [1]. In 1991, Kassirer and Kopelman [3] considered clinical reasoning as formulating strategies to synthesize diverse clinical data into narrower diagnostic differentials and navigating risk– benefit trade-offs in management decisions. In 216, Cooper and Frain [4] considered clinical reasoning …								1	4	Secondly, medical professionals must cultivate good insight into personal competency levels [67]; understand the processes, strengths, and weaknesses of cognitive models (Table 3); and be able to apply the most appropriate clinical reasoning strategy in real-world situations, while being mindful of its pitfalls and how to address them.	script development; metacognition				1	5	Heuristics; HDR; Illness Scripts; Bayes
48	Patel, Vimla L.; Kaufman, David R.; Kannampallil, Thomas G.	Diagnostic Reasoning and Decision Making in the Context of Health Information Technology	2013	Book Chapter	19	17	2											1	1	strategies to mitigate the effects of diagnostic errors under three categories: increasing the knowledge and experience (i.e., expertise) of physicians, improving their reasoning process, and providing external support structures and tools. Approaches to improving medical knowledge involved education and training (e.g., Friedlander & Phillips, 1984; Singh, Petersen, & Thomas, 26), simulation-base…					1	8	Deductive & Inductive Reasoning; HDR; Heuristics; Dual-Process
49	Pelaccia, Thierry; Tardif, Jacques; Triby, Emmanuel; Charlin, Bernard	An analysis of clinical reasoning through a recent and comprehensive approach: the dual-process theory	2011	Orginial Research	8	31	1	2		"linical reasoning refers to ‘the cognitive process that is necessary to evaluate and manage a patient’s medical problem’ (1). It allows physi- cians to make diagnoses and decisions (e.g. laboratory tests and drug prescriptions), and is considered as one of the major determining factors of clinical competence"	1	1	We must recognize that the academic environment of medical students hardly promotes the active development of clinical reasoning (5). Indeed, although medical educators share the view of clinical reasoning as a major determinant of physicians’ expertise, it is not often an explicit educational objective in medical universities	clinical reasoning; neglected element				1	2						1		Dual-Process; HDR; Intuition; Pattern Recognition
50	Roex, Ann; Degryse, Jan	Viewpoint: Introducing the Concept of Epistemological Beliefs into Medical Education: The Hot-Air-Balloon Metaphor:	2007	Orginial Research	4	1			2						1	2	Third, while emphasizing the use ofEBM in medical practice, equal attention needs to be given to how such (scientific) knowledge is to be understood, integrated with existing knowledge, and applied to individual patients. Scientific knowledge has to be understood from the perspective in which it was found, and it has to be applied correctly in each specific context. For example, a physician may h…	1	1	The most relevant question for medical education is whether the introduction of the dimension of epistemological beliefs in existing instructional environments (e.g., by training students to articulate their epistemological beliefs or by confronting students with reasoning processes based on more sophisticated levels of epistemological beliefs) would enhance students’ medical competence and perfo…					1	3	Metacognition; Pattern Recognition
51	Sackett, D. L.; Rosenberg, W. M.	The need for evidence-based medicine	1995	Orginial Research		1			6						1	2
52	Schmidt, H. G.; Norman, G. R.; Boshuizen, H. P.	A cognitive perspective on medical expertise: theory and implication	1990	Orginial Research	3	2	1																		1	1	Heuristics
53	Schmidt, Henk G; Mamede, Sílvia	How to improve the teaching of clinical reasoning: a narrative review and a proposal	2015	Narrative	1	4	1				1	2	The ﬁrst and perhaps most important is that, given the signiﬁcance attached to teaching medical students to reason clinically, research is largely lacking. There is a real need for studies that may help us progress in this domain. This is particularly important because the ﬁeld cannot rely on clerkships or rotations as the breeding ground for this skill. The variety of cases offered to students i…	clinical reasoning; neglected element; ineffective approach				1	1	If pathophysiological knowledge – through repeated application – has become encapsulated and rudimentary illness scripts emerge in memory, the focus in the teaching ofCR could shift to deliberate reﬂection as a tool for learning how to differentiate among various diseases and between the often subtle variations in how disease expresses itself. Such a compare-and-contrast approach has been demonst…					1	2	HDR; Heuristic
54	Schmidt, Henk G; Rikers, Remy M J P	How expertise develops in medicine: knowledge encapsulation and illness script formation	2007	Review	17																				1	1	HDR
55	Schmidt, Henk G.; Mamede, Silvia	How cognitive psychology changed the face of medical education research	2020	Review	12	26	7				1	1	Indeed, more recently, as dual-process theories have gained attention, these proposals have also gained the form of interventions such as courses on clinical reasoning and cognitive bias (Norman et al. 217). Not surprisingly, whenever trainees’ actual diagnostic performance was evaluated, the effect of these process-oriented interventions has been null or minimal	clinical reasoning; ineffective approach											1	5	HDR; Heuristics; Deliberate Reflection
56	Schuwirth, Lambert W.T.; Durning, Steven J.; King, Svetlana M.	Assessment of clinical reasoning: three evolutions of thought	2020	Review	3	48	7
57	Shea, Graham Ka-Hon; Chan, Pun-Chuen	Clinical Reasoning in Medical Education: A Primer for Medical Students	2024	Orginial Research	4	41				"Clinical reasoning ultimately describes all mental processes associated with the provision of healthcare and is considered a core competency."	1	3	A global phenomenon of our age is that in traditional curricula, medical students learn clinical reasoning implicitly, through experience, and apprenticeship.1–4 Expert consensus concurs that medical schools have placed insufficient emphasis in teaching clinical reasoning. Few medical school curricula place an emphasis on teaching students how to think about clinical problems.1 Perhaps in respons…	clinical reasoning; neglected element											1	1	Illness Script
58	Shimizu, Taro	DECLARE: A Comprehensive, Multifaceted Cognitive Forcing Strategy to Confront Complex Cases	2023	Perspective	2	6																			1	1	Semantic Qualifiers; Cognitive Load
59	Shin, Hyoung Seok	Reasoning processes in clinical reasoning: from the perspective of cognitive psychology	2019	Review	2	29	3											1	1	For this, medical schools should pursue problem-based learning by providing students with various opportunities to gain content knowledge as well as develop the critical thinking skills —such as data analysis skills, metacognitive skills, causal reasoning, systems thinking, and so forth—required for problem solving in a holistic manner so that they can improve their reasoning skills and freely us…	learning approach; problem-based learning				1	6	Causal Reasoning; Induction v. Deducion;
60	Si, Jihyun	Strategies for developing pre-clinical medical students’ clinical reasoning based on illness script formation: a systematic review	2022	Systematic Review	6	49	4				1	2	Clinical reasoning is a fundamental part of doctors’ competencies, and an explicit curriculum for clinical reasoning should be incorporated at every level of medical school [1]. However, medical students do not usually receive this training until their clinical rotations Charlin et al. [6] argued that illness script formation should be a focus in medical education in terms of clinical reasoning d…	clinical reasoning; neglected element				1	2	A direct illness script teaching method that helps students develop correct problem representations and illness scripts is also useful in terms of the construction of pre-clinical students’ illness scripts [1,23]. This approach explicitly teaches illness script construction with an illness script worksheet. Illness script building should start from the beginning of medical training as this script…	illness script teaching
61	Taha, Mohamed Hassan; Mukhtar, Wail Nuri Osman; Preston, Robyn	The Evolving Role of the Medical Profession and Medical Graduates	2025	Book Chapter				10							1	1													"System integration demands not only clinical acumen but also skills in teamwork, communication, and systems navigation, positioning physicians as facilitators of a seamless, patient-centered healthcare experience"
62	Thampy, Harish; Willert, Emma; Ramani, Subha	Assessing Clinical Reasoning: Targeting the Higher Levels of thePyramid	2019	Orginial Research	4	26	7			"Clinical reasoning is the Bthinking and decision making processes associated with clinical practice."	1	1	Since clinical reasoning proficiency in knowledge tests or simulated settings does not automatically transfer to real-life clinical settings, it is critical to continue assessment in the workplace, thereby targeting the top of Miller’spyramid at the Bdoes^ level.2 Clinical teachers should assess how learners tackle uncertainty and detect when the reasoning process is derailed by limitations in kn…	clinical reasoning; ineffective approach; does not transfer to clinical practice											1	1	Intuition; Pattern Recognition
63	Tonelli, Mark R.; Bluhm, Robyn	Teaching Medical Epistemology within an Evidence-Based Medicine Curriculum	2021	Orginial Research	2	1	2		8		1	1	Epistemology is the branch of philosophy that deals with the nature, value, and use of knowledge. Currently, however, epistemology receives little or no formal attention in medical education.	epistemology; neglected element	1	8	Yet in practice, and increasingly over time, EBM has shifted from encouraging individual engagement with the medial literature (as depicted in the original JAMA article) to espousing reliance on aggregated and curated summaries, representing the kind of unquestioned, and frequently disappointing, authority that it aimed to replace. As seen in Dr. Lee’s encounter with Mr. Jackson, the primary epis…								1	1	Metacognition
64	Torre, Dario; Chamberland, Martine; Mamede, Silvia	Implementation of three knowledge-oriented instructional strategies to teach clinical reasoning: Self-explanation, a concept mapping exercise, and deliberate reflection: AMEE Guide No. 15	2023	Guideline	9	49	4				1	2	Despite its importance, until recently, undergraduate and postgraduate programs did not include specific activities for teaching clinical reasoning There is no clear guidance on what to teach, when and with which instructional strategies in a longitudinal clinical reasoning curriculum	clinical reasoning; neglected element				1	1						1	3	Information Processing Theory; Deliberation Reflection
65	Westen, Drew; Weinberger, Joel	In praise of clinical judgment: Meehl's forgotten legacy	2005	Orginial Research	2
66	Woods, Nicole N	Science is fundamental: the role of biomedical knowledge in clinical reasoning	2007	Orginial Research	6	8	2				1	2	This is a critical question for clinical teachers. It has been assumed since Flexner that basic science education is a critical part of medical training. Yet there is little basis for this assumption. The structure of the traditional medical curriculum in which basic sciences courses are taught ﬁrst, and are followed by clinical training, may simply not be conducive to this type of learning	ineffective approach				1	2	If experienced clinicians do not explicitly and overtly express basic science concepts in their work-up of clinical cases, it seems highly unlikely that clinical clerks or even junior residents will be able to spontaneously see the connections and apply their knowledge correctly. Thus, medical training must be structured so that the relationship between biomedical concepts and clinical facts is m…
67	Xu, Hongyun; Ang, Benson W. G.; Soh, Jian Yi; Ponnamperuma, Gominda G.	Methods to Improve Diagnostic Reasoning in Undergraduate Medical Education in the Clinical Setting: a Systematic Review	2021	Systematic Review	5	5	12			"Clinical reasoning (CR) can be defined as “a process that operates toward the purpose of arriving at a diagnosis, treatment, and/or management plan."	1	1	CR is often assumed to be a process that can be learnt through direct observation of expert clinicians.11 This leads to students receiving irregular feedback and varying quality of supervision,12 causing poor knowledge structures and an inability to synthesize clinical features during patient encounters.	clinical reasoning; ineffective approach											1	3	Deliberate Reflection; Schema
68	Yazdani, Shahram; Hoseini Abardeh, Maryam	Five decades of research and theorization on clinical reasoning: a critical review	2019	Review	1	67	2			"Clinical reasoning is a complex cognitive process that is essential to evaluate and manage a patient’s medical problem.1 It includes the diagnosis of the patient problem, making a therapeutic decision and estimating the prognosis for the patient."															1	5	HDR; Schema; Metacognition; Intuition
69	Young, Meredith; Thomas, Aliki; Gordon, David; Gruppen, Larry; Lubarsky, Stuart; Rencic, Joseph; Ballard, Tiffany; Holmboe, Eric; Da Silva, Ana; Ratcliffe, Temple; Schuwirth, Lambert; Durning, Steven J.	The terminology of clinical reasoning in health professions education: Implications and considerations	2019	Scoping		71
		Total # Articles			61	59	40	17	15
	Color Scheme:	Mentions
	Green cells	<5
	Yellow cells	2026-05-20
	Red cells	>20
