# Supplementary material
Source: Research Square preprint supplement (doi:10.21203/rs.3.rs-9469558/v1)
Supplement: Supplementary file 2 [file e415c64bc8328acbf48e8634.docx]

# Appendices

## **A. Tables and Figures**

| Search String | |
| --- | --- |
| Clinical Expertise | "clinical expertise"[Title/Abstract] OR "medical expertise"[Title/Abstract] OR "clinical competence"[Title/Abstract] OR "professional expertise"[Title/Abstract] OR "diagnostic expertise"[Title/Abstract] OR "expert performance"[Title/Abstract] OR "clinical reasoning"[Title/Abstract] OR "clinical decision making"[Title/Abstract] OR "expertise development"[Title/Abstract] OR "skill acquisition"[Title/Abstract] OR "deliberate practice"[Title/Abstract] |
| AND | |
| Medical Education | "medical training"[Title/Abstract] OR "medical education"[Title/Abstract] OR "medical school"[Title/Abstract] OR "residency training"[Title/Abstract] OR "graduate medical education"[Title/Abstract] OR "clinical training"[Title/Abstract] OR "medical curriculum"[Title/Abstract] OR "undergraduate medical education"[Title/Abstract] OR "postgraduate medical education"[Title/Abstract] |
| NOT | |
| Exclusions | nurs* OR cardiol* OR neurol* OR psychiat* OR surg* OR surgical* OR pediatric* OR oncolog* OR radiol* OR anesthesiol* OR orthoped* OR dermatol* OR ophthalmol* OR otolaryngol* OR urolog* OR gastroenterol* OR pulmonol* OR nephrol* OR endocrinol* OR rheumatol* OR hematol* OR dent* OR emergency |

Table 1: Utilized Boolean Search String

| **Geographic Origin** | **Number of Articles** | **Percentage** |
| --- | --- | --- |
| **Europe** | 38 | 55.1 |
| **North America** | 22 | 31.9 |
| **Asia** | 4 | 5.8 |
| **Oceania** | 4 | 5.8 |
| **Middle East** | 1 | 1.4 |
| **Total** | **69** | 100 |
| **Article Type** | **Number of Articles** | **Percentage** |
| **Original Research Article** | **42** | 60.9 |
| **Review** | **18** | 26.1 |
| **Perspective** | **5** | 7.25 |
| **Book Chapter** | **2** | 2.90 |
| **Other** | **2** | 2.90 |
| **Total** | **69** | 100 |

Table 2: Geographic distribution and article types


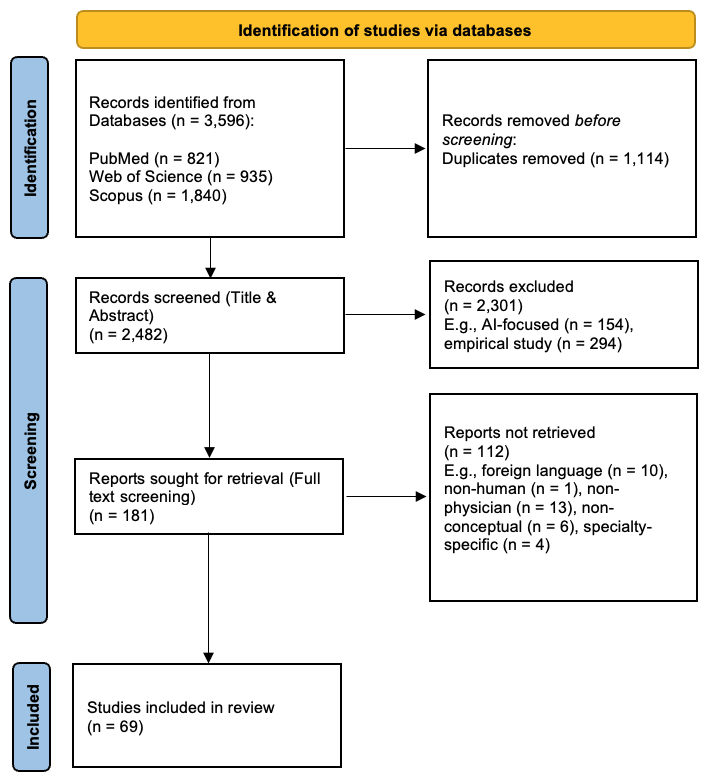


Figure 1: PRISMA flow-chart

Figure 2: Publications over time

| Terminologies | |
| --- | --- |
| Expert | **# Articles** |
| Expert | 57 |
| Expert Clinical Reasoning | 7 |
| Expert Clinician | 7 |
| Expert Physician | 5 |
| Expert Judgment | 4 |
| Adaptive Expert | 2 |
| Clinical Expert | 2 |
| Expert Diagnostic Reasoning | 2 |
| Expert Diagnostician | 2 |
| Expert Professionals | 1 |
| Physician Expert | 1 |
| Routine Expert | 1 |
| Expertise | **# Articles** |
| Expertise | 52 |
| Medical Expertise | 18 |
| Clinical Expertise | 13 |
| Adaptive Expertise | 8 |
| Diagnostic expertise | 4 |
| Clinical Reasoning Expertise | 3 |
| Routine Expertise | 2 |
| Hybrid Expertise | 1 |
| Others | **# Articles** |
| Clinical Reasoning | 61 |
| Clinical Competence | 18 |
| Mastery | 14 |
| Diagnostic Competence | 5 |
| Diagnostic Excellence | 3 |
| Professional Competence | 2 |
| Physician Competence | 2 |

Table 3: Various terminologies utilized

Table

| Terminology | Definition | Article |
| --- | --- | --- |
| Physician Expert | "The physician expert is the person who, together with his/her individual knowledge and experience, evaluates the available evidence—assuming that he/she has the skill to do so—and uses it in clinical reasoning and problem-solving tasks." | 3 |
| Medical Expertise | “Medical expertise manifests in a hybrid form—one that integrates both propositional-cognitive and practical-experiential dimensions […] Experts are those who have attained a high degree of hybridization of these forms of knowledge and who simultaneously sustain advanced levels of currency within their domain.” | 12 |
| Professional Competence | "Professional competence is the habitual and judicious use of communication, knowledge, technical skills, clinical reasoning, emotions, values, and reflection in daily practice for the benefit of the individual and community being served" | 22 |
| Expert Judgment | “Expert judgement be considered as an expert's ability to respond effectively in the moment to the limits of her automatic resources and to transition appropriately to a greater reliance on effortful processes when needed.” | 30 |
| Adaptive Expertise | "The resulting constructions of “adaptive expertise” emphasize the flexible use of knowledge and the ability to generate new solutions and learn from daily problem solving as key processes of clinical decision making. Specifically, adaptive experts are able to balance the efficient use of their previously acquired knowledge with the creation of new knowledge in response to novelty and complexity." | 40 |
| Expertise | "Within the traditional cognitive paradigm, expertise has been deﬁned broadly as the mastery of existing knowledge and techniques in a given domain" | 41 |
| Medical Expert | “Medical experts earn their title because of their years of experience and the amount of knowledge they are presumed to have acquired during that time.” | 43 |
| Routine Expert | "Routine experts have mastery of knowledge in their domain; they are able to apply their knowledge effectively and efﬁciently when solving well-known problems of practice and their learning is aimed towards making them more efﬁcient in their work." | 43 |
| Clinical Competence | “At its simplest, clinical competence may be regarded as the mastery of a body of relevant knowledge and the acquisition of a range of relevant skills, which would include interpersonal, clinical and technical components" | 45 |

Table 4: Varied definitions

## **B. Study Articles**

1. Amey DL, Donald PKJ, Teodorczuk APA. Teaching clinical reasoning to medical students. 2017.

2. Barrows HS, Feltovich PJ. The clinical reasoning process. Medical Education. 1987 Mar;21(2):86–91. doi:[10.1111/j.1365-2923.1987.tb00671.x](https://doi.org/10.1111/j.1365-2923.1987.tb00671.x)

3. Berndt M, Fischer MR. The role of electronic health records in clinical reasoning. Annals of the New York Academy of Sciences. 2018 Dec;1434(1):109–14. doi:[10.1111/nyas.13849](https://doi.org/10.1111/nyas.13849)

4. Bissessur SW, Geijteman ECT, Al‐Dulaimy M, Teunissen PimW, Richir MC, Arnold AER, et al. Therapeutic reasoning: from hiatus to hypothetical model. Evaluation Clinical Practice. 2009 Dec;15(6):985–9. doi:[10.1111/j.1365-2753.2009.01136.x](https://doi.org/10.1111/j.1365-2753.2009.01136.x)

5. Bleakley A, Farrow R, Gould D, Marshall R. Making sense of clinical reasoning: judgement and the evidence of the senses. Medical Education. 2003 Jun;37(6):544–52. doi:[10.1046/j.1365-2923.2003.01542.x](https://doi.org/10.1046/j.1365-2923.2003.01542.x)

6. Chamberland M, Mamede S, Bergeron L, Varpio L. A&nbsp;layered analysis of self-explanation and structured reflection to support clinical reasoning in medical students. Perspect Med Educ. 2020 Jul 30;10(3):171–9. doi:[10.1007/S40037-020-00603-2](https://doi.org/10.1007/S40037-020-00603-2)

7. Chen H, Xuan H, Cai J, Liu M, Shi L. The impact of empathy on medical students: an integrative review. BMC Med Educ. 2024 Apr 25;24(1):455. doi:[10.1186/s12909-024-05448-5](https://doi.org/10.1186/s12909-024-05448-5)

8. Conn JJ, Lake FR, McColl GJ, Bilszta JLC, Woodward‐Kron R. Clinical teaching and learning: from theory and research to application. Medical Journal of Australia. 2012 May;196(8):527–527. doi:[10.5694/mja10.11473](https://doi.org/10.5694/mja10.11473)

9. Cooper N, Bartlett M, Gay S, Hammond A, Lillicrap M, Matthan J, et al. Consensus statement on the content of clinical reasoning curricula in undergraduate medical education. Medical Teacher. 2021 Feb 1;43(2):152–9. doi:[10.1080/0142159X.2020.1842343](https://doi.org/10.1080/0142159X.2020.1842343)

10. Croskerry P. A Universal Model of Diagnostic Reasoning: Academic Medicine. 2009 Aug;84(8):1022–8. doi:[10.1097/ACM.0b013e3181ace703](https://doi.org/10.1097/ACM.0b013e3181ace703)

11. Croskerry P, Graber ML. The importance of cognition for improving diagnostic safety: Salerno redux? Diagnosis. 2025 Oct 20;12(4):557–63. doi:[10.1515/dx-2025-0106](https://doi.org/10.1515/dx-2025-0106)

12. Cuevas-Badallo A, Torres González O. Medical expertise as hybrid expertise: a proposal for the articulation of medical knowledge. Philos Ethics Humanit Med. 2025 Nov 4;20(1):38. doi:[10.1186/s13010-025-00194-y](https://doi.org/10.1186/s13010-025-00194-y)

13. Custers EJFM. Thirty years of illness scripts: Theoretical origins and practical applications. Medical Teacher. 2015 May 4;37(5):457–62. doi:[10.3109/0142159X.2014.956052](https://doi.org/10.3109/0142159X.2014.956052)

14. Custers EJFM. Medical Education and Cognitive Continuum Theory: An Alternative Perspective on Medical Problem Solving and Clinical Reasoning. Academic Medicine. 2013 Aug;88(8):1074–80. doi:[10.1097/ACM.0b013e31829a3b10](https://doi.org/10.1097/ACM.0b013e31829a3b10)

15. Cutrer WB, Sullivan WM, Fleming AE. Educational Strategies for Improving Clinical Reasoning. Current Problems in Pediatric and Adolescent Health Care. 2013 Oct;43(9):248–57. doi:[10.1016/j.cppeds.2013.07.005](https://doi.org/10.1016/j.cppeds.2013.07.005)

16. Dreicer JJ, Parsons AS, Joudi T, Stern S, Olson APJ, Rencic JJ. Framework and Schema are False Synonyms: Defining Terms to Improve Learning. Perspect Med Educ. 2023 Jul 28;12(1). doi:[10.5334/pme.947](https://doi.org/10.5334/pme.947)

17. Dumas D, Torre DM, Durning SJ. Using Relational Reasoning Strategies to Help Improve Clinical Reasoning Practice. Academic Medicine. 2018 May;93(5):709–14. doi:[10.1097/ACM.0000000000002114](https://doi.org/10.1097/ACM.0000000000002114)

18. Durning SJ, Artino AR, Schuwirth L, Van Der Vleuten C. Clarifying Assumptions to Enhance Our Understanding and Assessment of Clinical Reasoning: Academic Medicine. 2013 Apr;88(4):442–8. doi:[10.1097/ACM.0b013e3182851b5b](https://doi.org/10.1097/ACM.0b013e3182851b5b)

19. Durning SJ, Costanzo M, Artino AR, Van Der Vleuten C, Beckman TJ, Holmboe E, et al. Using Functional Magnetic Resonance Imaging to Improve How We Understand, Teach, and Assess Clinical Reasoning. Journal of Continuing Education in the Health Professions. 2014;34(1):76–82. doi:[10.1002/chp.21215](https://doi.org/10.1002/chp.21215)

20. Durning SJ, Jung E, Kim DH, Lee YM. Teaching clinical reasoning: principles from the literature to help improve instruction from the classroom to the bedside. Korean J Med Educ. 2024 Jun 1;36(2):145–55. doi:[10.3946/kjme.2024.292](https://doi.org/10.3946/kjme.2024.292)

21. Engeström Y, Pyörälä E. Using activity theory to transform medical work and learning. Medical Teacher. 2021 Jan 2;43(1):7–13. doi:[10.1080/0142159X.2020.1795105](https://doi.org/10.1080/0142159X.2020.1795105)

22. Epstein RM. Defining and Assessing Professional Competence. JAMA. 2002 Jan 9;287(2):226. doi:[10.1001/jama.287.2.226](https://doi.org/10.1001/jama.287.2.226)

23. Ericsson KA. Acquisition and Maintenance of Medical Expertise: A Perspective From the Expert-Performance Approach With Deliberate Practice. Academic Medicine. 2015 Nov;90(11):1471–86. doi:[10.1097/ACM.0000000000000939](https://doi.org/10.1097/ACM.0000000000000939)

24. Feufel MA, Flach JM. Medical education should teach heuristics rather than train them away. Medical Education. 2019 Apr;53(4):334–44. doi:[10.1111/medu.13789](https://doi.org/10.1111/medu.13789)

25. Guidry MM, Drennan RH, Weise J, Hamm LL, Hamm LL. Serum Sepsis, not Sickness. The American Journal of the Medical Sciences. 2011 Feb;341(2):88–91. doi:[10.1097/MAJ.0b013e3182083f14](https://doi.org/10.1097/MAJ.0b013e3182083f14)

26. Hall KH. Reviewing intuitive decision‐making and uncertainty: the implications for medical education. Medical Education. 2002 Mar;36(3):216–24. doi:[10.1046/j.1365-2923.2002.01140.x](https://doi.org/10.1046/j.1365-2923.2002.01140.x)

27. Hege I, Kononowicz AA, Berman NB, Lenzer B, Kiesewetter J. Advancing clinical reasoning in virtual patients - development and application of a conceptual framework. GMS J Med Educ. 2018;35(1):Doc12. doi:[10.3205/zma001159](https://doi.org/10.3205/zma001159) PubMed PMID: 29497697; PubMed Central PMCID: PMC5827186.

28. Ju H, Choi I. The Role of Argumentation in Hypothetico-Deductive Reasoning During Problem-Based Learning in Medical Education: A Conceptual Framework. Interdisciplinary Journal of Problem-Based Learning. 2017 Nov 14;12(1). doi:[10.7771/1541-5015.1638](https://doi.org/10.7771/1541-5015.1638)

29. Khin-Htun S, Kushairi A. Twelve Tips for Developing Clinical Reasoning Skills in the Pre-Clinical and Clinical Stages of Medical School. Medical Teacher. 2019 Sep 2;41(9):1007–11. doi:[10.1080/0142159X.2018.1502418](https://doi.org/10.1080/0142159X.2018.1502418)

30. Koufidis C, Manninen K, Nieminen J, Wohlin M, Silén C. Unravelling the polyphony in clinical reasoning research in medical education. Evaluation Clinical Practice. 2021 Apr;27(2):438–50. doi:[10.1111/jep.13432](https://doi.org/10.1111/jep.13432)

31. Kulasegaram KM, Grierson LEM, Norman GR. The roles of deliberate practice and innate ability in developing expertise: evidence and implications. Medical Education. 2013 Oct;47(10):979–89. doi:[10.1111/medu.12260](https://doi.org/10.1111/medu.12260)

32. Lane AS, Roberts C. Contextualised reflective competence: a new learning model promoting reflective practice for clinical training. BMC Med Educ. 2022 Dec;22(1):71. doi:[10.1186/s12909-022-03112-4](https://doi.org/10.1186/s12909-022-03112-4)

33. Magnani L. Basic Science Reasoning and Clinical Reasoning Intertwined: Epistemological Analysis and Consequences for Medical Education. Adv Health Sci Educ Theory Pract. 1997 May 1;2(2):115–30. doi:[10.1023/A:1009736414434](https://doi.org/10.1023/A:1009736414434)

34. Mamede S, Schmidt HG. Deliberate reflection and clinical reasoning: Founding ideas and empirical findings. Medical Education. 2023 Jan;57(1):76–85. doi:[10.1111/medu.14863](https://doi.org/10.1111/medu.14863)

35. Mathur A. Teaching Clinical Reasoning Through Cause‐and‐Effect Thinking: A Framework for Modern Medical Education. The Clinical Teacher. 2025 Oct;22(5):e70201. doi:[10.1111/tct.70201](https://doi.org/10.1111/tct.70201)

36. McColl GJ, Bilszta J, Harrap S. The requirement for bioscience knowledge in medical education. Medical Journal of Australia. 2012 Apr;196(6):409–409. doi:[10.5694/mja11.10474](https://doi.org/10.5694/mja11.10474)

37. Modi JN, Anshu, Gupta P, Singh T. Teaching and assessing clinical reasoning skills. Indian Pediatr. 2015 Sep;52(9):787–94. doi:[10.1007/s13312-015-0718-7](https://doi.org/10.1007/s13312-015-0718-7)

38. Mohd Tambeh SN, Yaman MN. Clinical reasoning training sessions for health educators—A scoping review. Journal of Taibah University Medical Sciences. 2023 Dec;18(6):1480–92. doi:[10.1016/j.jtumed.2023.06.002](https://doi.org/10.1016/j.jtumed.2023.06.002)

39. Moosapour H, Raza M, Rambod M, Soltani A. Conceptualization of category-oriented likelihood ratio: a useful tool for clinical diagnostic reasoning. BMC Med Educ. 2011 Dec;11(1):94. doi:[10.1186/1472-6920-11-94](https://doi.org/10.1186/1472-6920-11-94)

40. Mylopoulos M, Kulasegaram K, Woods NN. Developing the experts we need: Fostering adaptive expertise through education. Evaluation Clinical Practice. 2018 Jun;24(3):674–7. doi:[10.1111/jep.12905](https://doi.org/10.1111/jep.12905)

41. Mylopoulos M, Regehr G. Cognitive metaphors of expertise and knowledge: prospects and limitations for medical education. Medical Education. 2007 Dec;41(12):1159–65. doi:[10.1111/j.1365-2923.2007.02912.x](https://doi.org/10.1111/j.1365-2923.2007.02912.x)

42. Mylopoulos M, Regehr G. Putting the expert together again. Medical Education. 2011 Sep;45(9):920–6. doi:[10.1111/j.1365-2923.2011.04032.x](https://doi.org/10.1111/j.1365-2923.2011.04032.x)

43. Mylopoulos M, Woods NN. Having our cake and eating it too: seeking the best of both worlds in expertise research. Medical Education. 2009 May;43(5):406–13. doi:[10.1111/j.1365-2923.2009.03307.x](https://doi.org/10.1111/j.1365-2923.2009.03307.x)

44. Nandi PL. Ethical aspects of clinical practice. Arch Surg. 2000 Jan;135(1):22–5. doi:[10.1001/archsurg.135.1.22](https://doi.org/10.1001/archsurg.135.1.22) PubMed PMID: 10636342.

45. Newble DI. Assessing clinical competence at the undergraduate level. Medical Education. 1992 Nov;26(6):503–11. doi:[10.1111/j.1365-2923.1992.tb00213.x](https://doi.org/10.1111/j.1365-2923.1992.tb00213.x)

46. Newble DI. THE EVALUATION OF CLINICAL COMPETENCEM. Medical Journal of Australia. 1976 Jul;2(5):180–3. doi:[10.5694/j.1326-5377.1976.tb134455.x](https://doi.org/10.5694/j.1326-5377.1976.tb134455.x)

47. Ng IKS, Goh WGW, Teo DB, Chong KM, Tan LF, Teoh CM. Clinical reasoning in real-world practice: a primer for medical trainees and practitioners. Postgraduate Medical Journal. 2024 Dec 23;101(1191):68–75. doi:[10.1093/postmj/qgae079](https://doi.org/10.1093/postmj/qgae079)

48. Patel VL, Kaufman DR, Kannampallil TG. Diagnostic Reasoning and Decision Making in the Context of Health Information Technology. Reviews of Human Factors and Ergonomics. 2013 Oct;8(1):149–90. doi:[10.1177/1557234X13492978](https://doi.org/10.1177/1557234X13492978)

49. Pelaccia T, Tardif J, Triby E, Charlin B. An analysis of clinical reasoning through a recent and comprehensive approach: the dual-process theory. Medical Education Online. 2011 Jan;16(1):5890. doi:[10.3402/meo.v16i0.5890](https://doi.org/10.3402/meo.v16i0.5890)

50. Roex A, Degryse J. Viewpoint: Introducing the Concept of Epistemological Beliefs into Medical Education: The Hot-Air-Balloon Metaphor: Academic Medicine. 2007 Jun;82(6):616–20. doi:[10.1097/ACM.0b013e3180556abd](https://doi.org/10.1097/ACM.0b013e3180556abd)

51. Sackett DL, Rosenberg WM. The need for evidence-based medicine. J R Soc Med. 1995 Nov;88(11):620–4. doi:[10.1177/014107689508801105](https://doi.org/10.1177/014107689508801105) PubMed PMID: 8544145; PubMed Central PMCID: PMC1295384.

52. Schmidt HG, Norman GR, Boshuizen HP. A cognitive perspective on medical expertise: theory and implication. Acad Med. 1990 Oct;65(10):611–21. doi:[10.1097/00001888-199010000-00001](https://doi.org/10.1097/00001888-199010000-00001) PubMed PMID: 2261032.

53. Schmidt HG, Mamede S. How to improve the teaching of clinical reasoning: a narrative review and a proposal. Medical Education. 2015 Oct;49(10):961–73. doi:[10.1111/medu.12775](https://doi.org/10.1111/medu.12775)

54. Schmidt HG, Rikers RMJP. How expertise develops in medicine: knowledge encapsulation and illness script formation. Medical Education. 2007 Dec;41(12):1133–9. doi:[10.1111/j.1365-2923.2007.02915.x](https://doi.org/10.1111/j.1365-2923.2007.02915.x)

55. Schmidt HG, Mamede S. How cognitive psychology changed the face of medical education research. Adv in Health Sci Educ. 2020 Dec;25(5):1025–43. doi:[10.1007/s10459-020-10011-0](https://doi.org/10.1007/s10459-020-10011-0)

56. Schuwirth LWT, Durning SJ, King SM. Assessment of clinical reasoning: three evolutions of thought. Diagnosis. 2020 Aug 27;7(3):191–6. doi:[10.1515/dx-2019-0096](https://doi.org/10.1515/dx-2019-0096)

57. Shea GKH, Chan PC. Clinical Reasoning in Medical Education: A Primer for Medical Students. Teaching and Learning in Medicine. 2024 Aug 7;36(4):547–55. doi:[10.1080/10401334.2023.2230201](https://doi.org/10.1080/10401334.2023.2230201)

58. Shimizu T. DECLARE: A Comprehensive, Multifaceted Cognitive Forcing Strategy to Confront Complex Cases. IJGM. 2023 Apr;Volume 16:1505–11. doi:[10.2147/IJGM.S406165](https://doi.org/10.2147/IJGM.S406165)

59. Shin HS. Reasoning processes in clinical reasoning: from the perspective of cognitive psychology. Korean J Med Educ. 2019 Dec 1;31(4):299–308. doi:[10.3946/kjme.2019.140](https://doi.org/10.3946/kjme.2019.140)

60. Si J. Strategies for developing pre-clinical medical students’ clinical reasoning based on illness script formation: a systematic review. Korean J Med Educ. 2022 Mar 1;34(1):49–61. doi:[10.3946/kjme.2022.219](https://doi.org/10.3946/kjme.2022.219)

61. Taha MH, Mukhtar WNO, Preston R. The Evolving Role of the Medical Profession and Medical Graduates. In: Abdalla ME, Taha MH, Boelen C, editors. Social Accountability of Medical Schools [Internet]. Cham: Springer Nature Switzerland; 2025 [cited 2026 Jan 22]. p. 17–29. Available from: <https://link.springer.com/10.1007/978-3-031-94435-2_2> doi:[10.1007/978-3-031-94435-2_2](https://doi.org/10.1007/978-3-031-94435-2_2)

62. Thampy H, Willert E, Ramani S. Assessing Clinical Reasoning: Targeting the Higher Levels of thePyramid. J GEN INTERN MED. 2019 Aug;34(8):1631–6. doi:[10.1007/s11606-019-04953-4](https://doi.org/10.1007/s11606-019-04953-4)

63. Tonelli MR, Bluhm R. Teaching Medical Epistemology within an Evidence-Based Medicine Curriculum. Teaching and Learning in Medicine. 2021 Jan 1;33(1):98–105. doi:[10.1080/10401334.2020.1835666](https://doi.org/10.1080/10401334.2020.1835666)

64. Torre D, Chamberland M, Mamede S. Implementation of three knowledge-oriented instructional strategies to teach clinical reasoning: Self-explanation, a concept mapping exercise, and deliberate reflection: AMEE Guide No. 150. Medical Teacher. 2023 Jul 3;45(7):676–84. doi:[10.1080/0142159X.2022.2105200](https://doi.org/10.1080/0142159X.2022.2105200)

65. Westen D, Weinberger J. In praise of clinical judgment: Meehl’s forgotten legacy. J Clin Psychol. 2005 Oct;61(10):1257–76. doi:[10.1002/jclp.20181](https://doi.org/10.1002/jclp.20181)

66. Woods NN. Science is fundamental: the role of biomedical knowledge in clinical reasoning. Medical Education. 2007 Dec;41(12):1173–7. doi:[10.1111/j.1365-2923.2007.02911.x](https://doi.org/10.1111/j.1365-2923.2007.02911.x)

67. Xu H, Ang BWG, Soh JY, Ponnamperuma GG. Methods to Improve Diagnostic Reasoning in Undergraduate Medical Education in the Clinical Setting: a Systematic Review. J GEN INTERN MED. 2021 Sep;36(9):2745–54. doi:[10.1007/s11606-021-06916-0](https://doi.org/10.1007/s11606-021-06916-0)

68. Yazdani S, Hoseini Abardeh M. Five decades of research and theorization on clinical reasoning: a critical review. AMEP. 2019 Aug;Volume 10:703–16. doi:[10.2147/AMEP.S213492](https://doi.org/10.2147/AMEP.S213492)

69. Young M, Thomas A, Gordon D, Gruppen L, Lubarsky S, Rencic J, et al. The terminology of clinical reasoning in health professions education: Implications and considerations. Medical Teacher. 2019 Nov 2;41(11):1277–84. doi:[10.1080/0142159X.2019.1635686](https://doi.org/10.1080/0142159X.2019.1635686)
